# Supplementary material
Source: PubMed Central journal article supplement (PMC2999943)
Supplement: 1424-9634-10-010-s001.pdf [file 1424-9634-10-010-s001.pdf]

Supplementary Figure 1

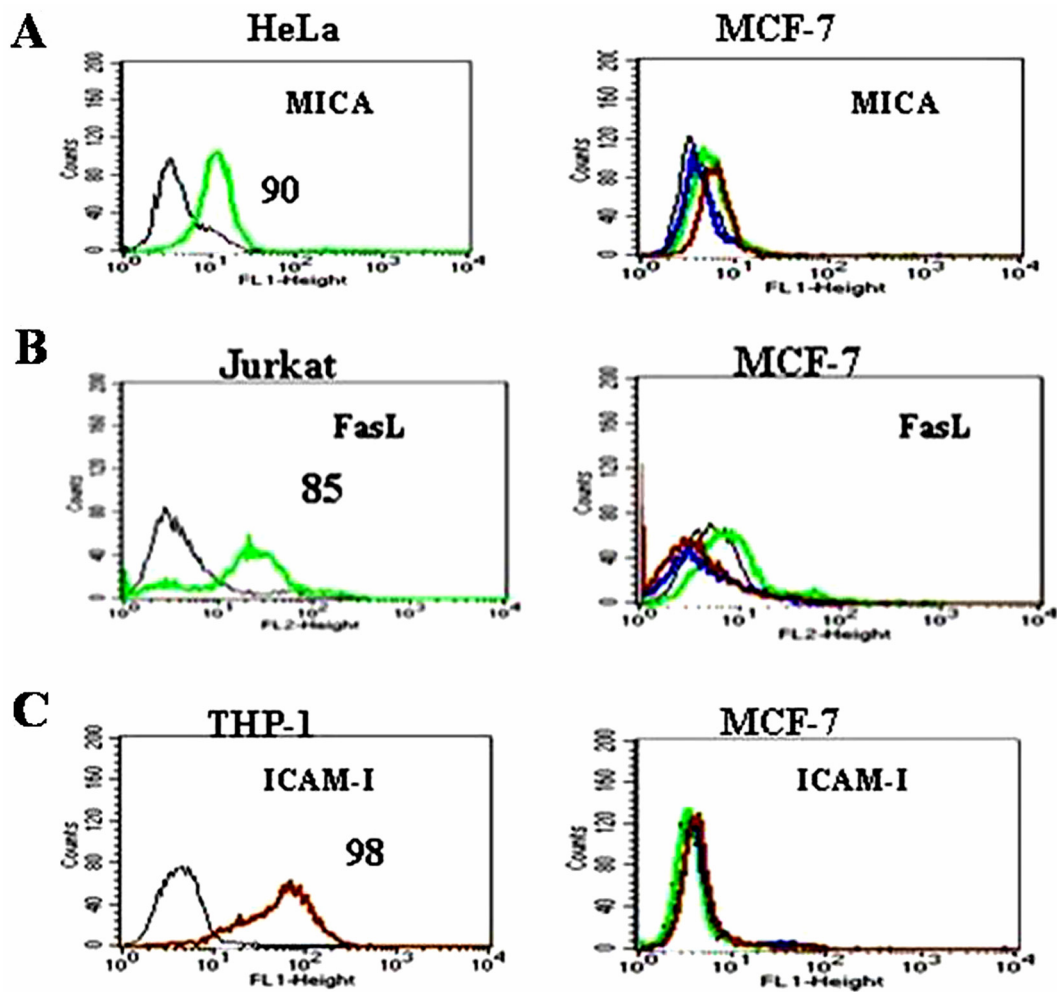

**Pamidronate and Zoledronate do not alter the expression of MICA, ICAM-I and FasL on MCF-7 cells.** (A) MCF-7 tumor cells were left untreated (green) or treated with 100  $\mu$ M Pamidronate (blue) and 100  $\mu$ M Zoledronate (brown) for 16-18 hours and stained for expression of MICA. HeLa cells as positive control are also shown. (B) FasL expression was analyzed on untreated Jurkat cells as positive control (green) and on untreated MCF-7 cells (green) or Pamidronate- (100  $\mu$ M, blue) and Zoledronate (100  $\mu$ M, brown)-treated MCF-7 cells. Isotype controls are shown in black. Representative data from three independent experiments are shown. (C) ICAM expression was analyzed on untreated THP-1 cells as positive control (brown) and on untreated MCF-7 (green) or Pamidronate- (100  $\mu$ M, blue) and Zoledronate (100  $\mu$ M, brown)-treated MCF-7 cells.
